# Supplementary material for: Robust orthogonal recombination system for versatile genomic elements rearrangement in yeast Saccharomyces Cerevisiae
Source: PubMed Central journal article supplement (PMC4609996; doi:10.1038/srep15249), 2015-10-19
Supplement: srep15249-s1.pdf [file srep15249-s1.pdf]

1 Robust orthogonal recombination system for versatile  
2 genomic elements rearrangement in yeast *Saccharomyces*

3 *Cerevisiae*

4 Qihui Lin<sup>a,b\*</sup>, Hao Qi<sup>a,b\*</sup>, Yi Wu<sup>a,b</sup>, Yingjin Yuan<sup>a,b†</sup>

5 a: Key Laboratory of Systems Bioengineering (Ministry of Education), Tianjin University, Tianjin,  
6 300072, PR China

7 b: SynBio Research Platform, Collaborative Innovation Center of Chemical Science and  
8 Engineering (Tianjin), School of Chemical Engineering and Technology, Tianjin University, Tianjin,  
9 300072, PR China

10

11 \* These authors contributed equally to this work.

12 † Correspondence to: yjyuan@tju.edu.cn

13

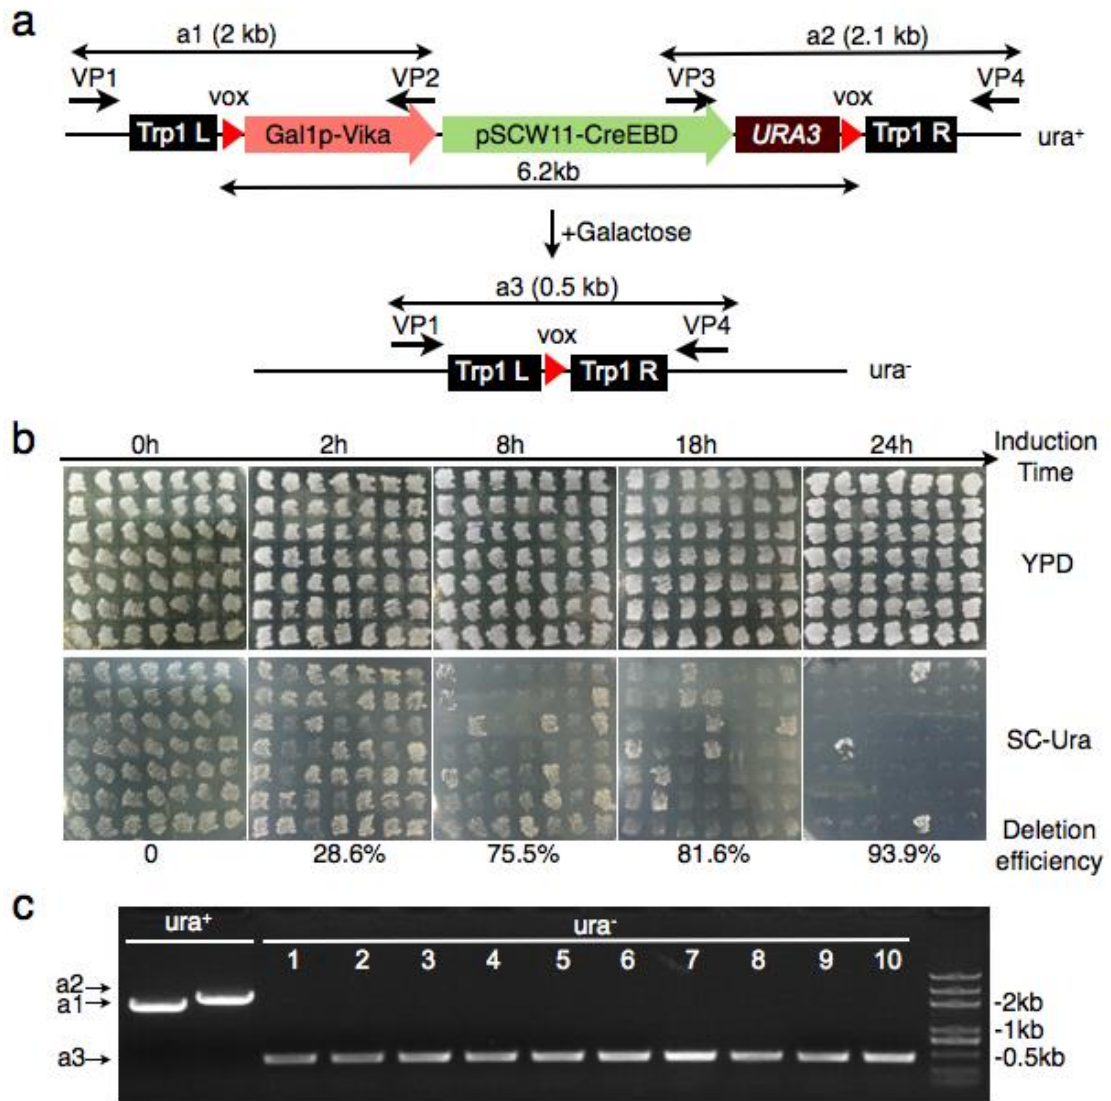

14

15 **Supplementary Figure 1| Vika mediated DNA cassette self-excision.** (A)  
 16 Schematic of DNA cassette encoding recombinase vika and selective marker  
 17 URA3 flanked by vox site for self-excision. (B) After inducing expression of  
 18 recombinase Vika, cell was collected at various time point and grown on  
 19 non-selective YPD and selective SC-Ura plate. (C) Excision was confirmed by  
 20 amplified corresponding a3 DNA fragment from cell collected from 10 cell  
 21 colonies at time point of 24hr. The most left two lanes are DNA fragement a1 and  
 22 a2 amplified from the cell before Vika-mediated excision.

23

24 **Table S1 : Strains used in this study**

| Name            | Genotype/Description                                                                       | Source                            |
|-----------------|--------------------------------------------------------------------------------------------|-----------------------------------|
| <b>Strain</b>   |                                                                                            |                                   |
| BY4741          | MATa (Leu2Δ0 LYS2 met15 his3Δ1 ura3Δ0)                                                     | From Prof. Jef Boeke <sup>1</sup> |
| BY4742          | MATα (his3 Δ 1, leu Δ 0, lys2 Δ 0, ura3 Δ 0 )                                              | From Prof. Jef Boeke <sup>1</sup> |
| <i>synIII</i>   | MATα (MET15 lys1Δ0 ura3Δ0 his3Δ1leu2Δ0 synIII sup61::HO)                                   | From Porf. Jef Boeke <sup>1</sup> |
| yLQH201         | MATa (Leu2Δ0 LYS2 met15 his3Δ1 ura3Δ0)<br>[pRS415-GAL1p-Cre-loxP-His-loxP ]                | This study                        |
| yLQH202         | MATa (Leu2Δ0 LYS2 met15 his3Δ1 ura3Δ0)<br>[pRS415-GAL1p-Cre-vox-Ura3-vox ]                 | This study                        |
| yLQH203         | MATa (Leu2Δ0 LYS2 met15 his3Δ1 ura3Δ0)<br>[pRS415-GAL1p-Vika-loxP-His3-loxP ]              | This study                        |
| yLQH204         | MATa (Leu2Δ0 LYS2 met15 his3Δ1 ura3Δ0)<br>[pRS415-GAL1p-Vika-vox-Ura3-vox ]                | This study                        |
| yLQH205         | MATα (MET15 lys1Δ0 ura3Δ0 his3Δ1leu2Δ0 synIII sup61::HO trp1::pSCW11-Cre-pGAL1-Vika-Ura3 ) | This study                        |
| yLQH206         | MATα (MET15 lys1Δ0 ura3Δ0 his3Δ1leu2Δ0 synIII sup61::HO trp1::vox-pSCW11-Cre-Ura3-vox)     | This study                        |
| yLQH207         | MATα (MET15 lys1Δ0 ura3Δ0 his3Δ1leu2Δ0 trp1::vox-pSCW11-Cre-pGAL1-Vika-ura3-vox            | This study                        |
| yLQH208         | MATα (MET15 lys1Δ0 ura3Δ0 his3Δ1leu2Δ0 synIII sup61::HO trp1::vox)                         | This study                        |
| yLQH211         | MATa (Leu2Δ0 LYS2 met15 his3Δ1 ura3Δ0 HO::vox-RFP-vox-loxP-GFP-loxP-URA3)                  | This study                        |
| yLQH212         | MATa (Leu2Δ0 LYS2 met15 his3Δ1 ura3Δ0 HO::vox-RFP-loxP-vox-GFP-loxP-URA3)                  | This study                        |
| <b>Plasmids</b> |                                                                                            |                                   |
| pLM158          | pSCW11-CreEBD                                                                              | This study                        |
| pUC57-Vika      | Codon-optimized Vika ORF                                                                   | Genewiz. Inc                      |
| pRS vector      | pRS413, pRS414, pRS415, pRS416                                                             | From Prof.                        |
| pYES2           | Vector with GAL1p and CYC1t                                                                | Gift from Prof. Jef Boeke         |
| pLQH122         | pYES2-GAL1p-Cre-CYC1t                                                                      | This study                        |
| pLQH124         | pYES2-GAL1p-Vika-CYC1t                                                                     | This study                        |
| pLQH134         | pRS415-pGAL1p-Cre-CYC1t                                                                    | This study                        |
| pLQH135         | pRS415-pGAL1p-Vika-CYC1t                                                                   | This study                        |

25

26

27 **Table S2: Primers used in this study**

| Primers                                             | Sequence(5'-3')                                                               |
|-----------------------------------------------------|-------------------------------------------------------------------------------|
| <b>Expression plasmid construction</b>              |                                                                               |
| Cre-HindIII-F                                       | TATT <u>AAGCTT</u> ATGTCCAATTTACTGACCGT                                       |
| Cre-XbaI-R                                          | GCCCTCTAGATTAATCGCCATCTTCCAGCAGG                                              |
| Vika-HindIII-F                                      | CGCA <u>AAGCTT</u> ATGACTGATTTGACTCCTTTCC                                     |
| Vika-XbaI-R                                         | CGGATCTAGATTATCTTTGTCTCCTCTTCTGA                                              |
| Gal1p-EcoRI-Trp1-F                                  | AGACGTATTGTGACCCGGGA <u>ATTCC</u> GGATTAGAAGCCGCCGAGC                         |
| CYC1t-EcoRI-Trp1-R                                  | ACAAGTAATTGGGCTGCAGGA <u>ATTTC</u> GCAAATTAAAGCCTTCGAGC                       |
| <b>Orthogonal plasmids construction</b>             |                                                                               |
| pRS415-XhoI-GAL1p-F                                 | ATTGGGTACGGGGCCCCCCTCGAGCGGATTAGAAGCCGCCGAGC                                  |
| CYC1t-vox-R                                         | <b>AATACGTCTGAGAATGGGCGTTCTCAGACCTATTGCAAATTTAAAGCCTTCGAGC</b>                |
| CYC1t-loxP-R                                        | <b>ATAACTTCGTATAATGTATGCTATACGAAGTTATGCAAATTTAAAGCCTTCGAGC</b>                |
| vox-Ura3-F                                          | <b>AATAGGTCTGAGAACGCCATTCTCAGACGTATTTTCAATTCATCATTTTTTTTT</b>                 |
| Ura-vox-R1                                          | <b>AATACGTCTGAGAATGGGCGTTCTCAGACCTATTTTAGTTTTTGCTGGCCGCATC</b>                |
| Ura-vox-pRS415-XhoI-R2                              | GGAATTCGATATCAAGCTTATCGATACCGTCGACCTCGAGA <u>AATACGAA</u> TACGTCTGAGAATGGGCG  |
| loxP-His3-F                                         | <b>ATAACTTCGTATAGCATACATTATACGAAGTTATCTAGTACACTCTATATTTTTT</b>                |
| His-loxP-R1                                         | <b>ATAACTTCGTATAATGTATGCTATACGAAGTTATCTACATAAGAACA</b><br>CCTTTGG             |
| His-loxP-pRS415-XhoI-R2                             | GGAATTCGATATCAAGCTTATCGATACCGTCGACCTCGAGA <u>AATACGAT</u> AACTTCGTATAATGTATG  |
| <b>Sequential and selective deletion experiment</b> |                                                                               |
| EcoRI-vox-RFP-F                                     | CATGA <u>ATTCA</u> ATAGGTCTGAGAACGCCATTCTCAGACGTATTAGC<br>TTTTCAATTCAATTCATCA |
| RFP-vox-KpnI-R                                      | TATGGTACCAATACGTCTGAGAATGGGCGTTCTCAGACCTATTTCATAAAGAGCGACCTCAT                |
| RFP-loxP-KpnI-R                                     | ATTGGTACCATAA <u>ACTTC</u> GTATAATGTATGCTATACGAAGTTATTCAATAAGAGCGACCTCATG     |
| KpnI-vox-GFP-F                                      | TATGGTACCAATAGGTCTGAGAACGCCATTCTCAGACGTATTTGTTTTGCAAAAAGAACAAAAC              |

|                                        |                                                                         |
|----------------------------------------|-------------------------------------------------------------------------|
| KpnI-loxP-GFP-F                        | TATGGTACCAATACGTCTGAGAATGGGCGTTCTCAGACCTATTTCATAAAGAGCGACCTCAT          |
| GFP-loxP-BamHI-R                       | TTGGGATCCATAAATTTCGTATAATGTATGCTATACGAAGTTATAAAGCCACGCGTGTGCACC         |
| <b>SCRaMble termination experiment</b> |                                                                         |
| trp1L-vox-F                            | ATGTCTGTTATTAATTTTCAC                                                   |
| trp1L-vox-R                            | ggcggcttctaaccgAATACGTCTGAGAATGGGCGTTCTCAGACCTATTAGGAACTCTTGGTATTCTT    |
| GAL1p-Vika-CYC1t-F                     | aataccaagagttcctAATAGGTCTGAGAACGCCCATTTCTCAGACGTATTCGGATTAGAAGCCGCCGAG  |
| GAL1p-Vika-CYC1t-R                     | aagaatcacctctgggtagtagtatctcattgctcaagacacaagtaatGCAAATTAAAGCCTTCGAG    |
| pSCW11-CreEBD-F                        | tgaaaacctgcttgagaaggtttgggacgctcgaaggcttaatttgcAATTACTTGTGTCTTGACG      |
| pSCW11-CreEBD-R                        | caaagaaccgaaatcaaaaaaagaataaaaaaaatgatgaattgaaTCAAGCAAGGTTTTTCAGTA      |
| URA3-vox-F                             | ctgtacagacgctgtacgcatgtaacattatactgaaaacctgcttgaTTCAATTCATCATTTTTTT     |
| URA3-vox-R                             | aataactggcaaacggAATACGTCTGAGAATGGGCGTTCTCAGACCTATTTTAGTTTTGCTGGCCGCAT   |
| pSCW11-Cre-F                           | ATTCTCAGACGTATTGTGACCCGGGAATTCctgcagcccAATTACTTGTGTCTTGACG              |
| pSCW11-Cre-R                           | AAAGAATAAAAAAAAAAATGATGAATTGAATTGAAATCGATTCAAGCAAGGTTTTTCAGTA           |
| Ura3-Cre-F                             | TGTAACATTATACTGAAAACCTTGCTTGAATCGATTTCAATTCAATTCATCATTTTTTT             |
| Ura-vox-R                              | AATAACTGGCAAACCGAATACGTCTGAGAATGGGCGTTCTCAGACCTATTttagtttctgctggccgcat  |
| vox-Trp1R-F                            | cggccagcaaaactaaAATAGGTCTGAGAACGCCCATTTCTCAGACGTATTGGTTTTGCCAGTTATTTAAA |
| vox-Trp1R-R                            | CTATTTCTTAGCATTTTTGACGAAA                                               |
| VP1                                    | GCACGTGAGTATACGTGATT                                                    |
| VP2                                    | GCAAATTAAAGCCTTCGAGC                                                    |
| VP3                                    | AAACGCTCTAAGGAGAACA                                                     |
| VP4                                    | CTTGCTTTTCAAAGGCCTG                                                     |

28

29

30

31

32

33 **References:**

34

35

36 1. Annaluru, N. et al. Total synthesis of a functional designer eukaryotic  
37 chromosome. *Science* **344**, 55-58 (2014).

38

39
